# Supplementary material for: Prolonged-acting, Multi-targeting Gallium Nanoparticles Potently Inhibit Growth of Both HIV and Mycobacteria in Co-Infected Human Macrophages
Source: PubMed Central journal article supplement (PMC4351534; doi:10.1038/srep08824), 2015-03-06

**Prolonged-acting, Multi-targeting Gallium Nanoparticles Potently Inhibit Growth of Both  
HIV and Mycobacteria in Co-Infected Human Macrophages**

Prabakaran Narayanasamy<sup>a\*</sup>, Barbara L. Switzer<sup>b,c</sup> and Bradley E. Britigan<sup>a,b,c\*</sup>

*<sup>a</sup>Department of Pathology and Microbiology; <sup>b</sup>Department of Internal Medicine, College of  
Medicine, University of Nebraska Medical Center, Omaha, Nebraska, 68198 and Research  
Service, VA Medical Center- Nebraska Western Iowa, Omaha, Nebraska 68105*

Corresponding authors: for PN: p.narayanasamy@unmc.edu; for BB:

bradley.britigan@unmc.edu

Supporting information

Supplementary Figure 1: **Combined HIV-smegmatis infection and use of isoniazid, rifampin, tenofavir, nevirapine combination.** A). RT assay of HIV from co-infection showing no HIV growth, Data are analysed using the t-test. Data are shown as mean +/- s.e.m. for n = 9,  $P < 0.05$ . B). P24 staining of co-infected macrophage showing no HIV growth, C). CFU counting of mycobacteria from co-infection showing no bacterial growth. Data are analysed using the t-test. Data are shown as mean +/- s.e.m. for n = 3,  $P < 0.05$ .

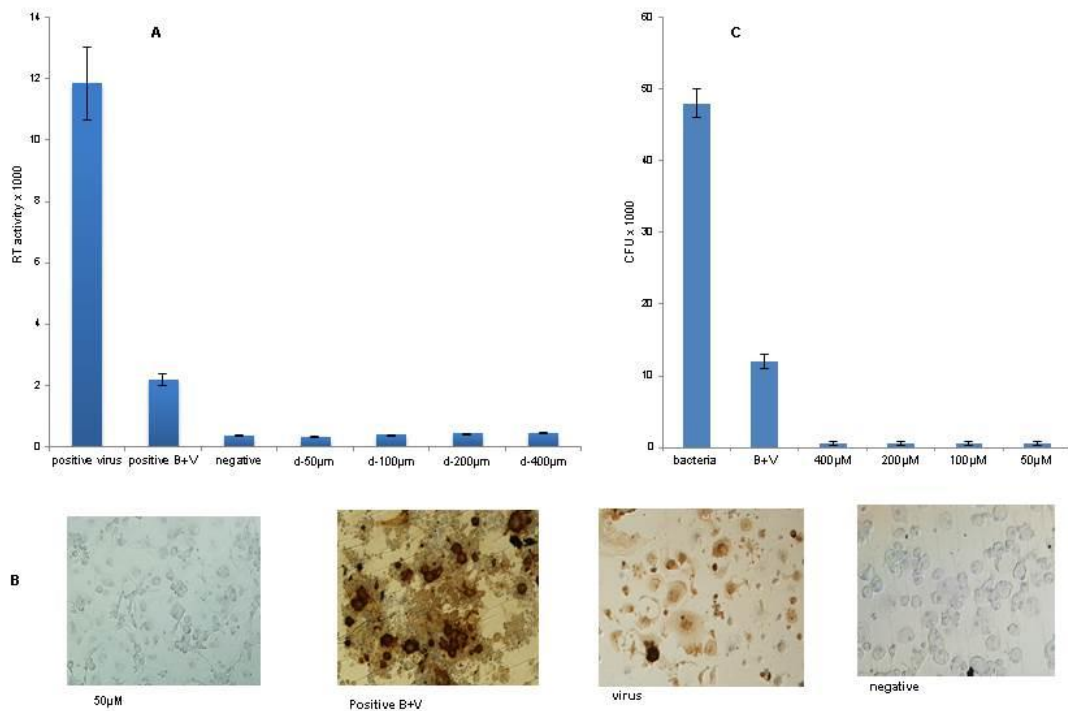

Supplementary Figure 2: **Bacterial infection followed by HIV infection and use of isoniazid, rifampin, tenofavir, nevirapine combination.** A). RT assay of HIV from co-infection showing no HIV growth, Data are analysed using the t-test. Data are shown as mean +/- s.e.m. for n = 9,  $P < 0.05$ . B). P24 staining of co-infected macrophage showing no HIV growth, C). CFU counting of mycobacteria from co-infection showing no bacterial growth. Data are analysed using the t-test. Data are shown as mean +/- s.e.m. for n = 3,  $P < 0.05$ .

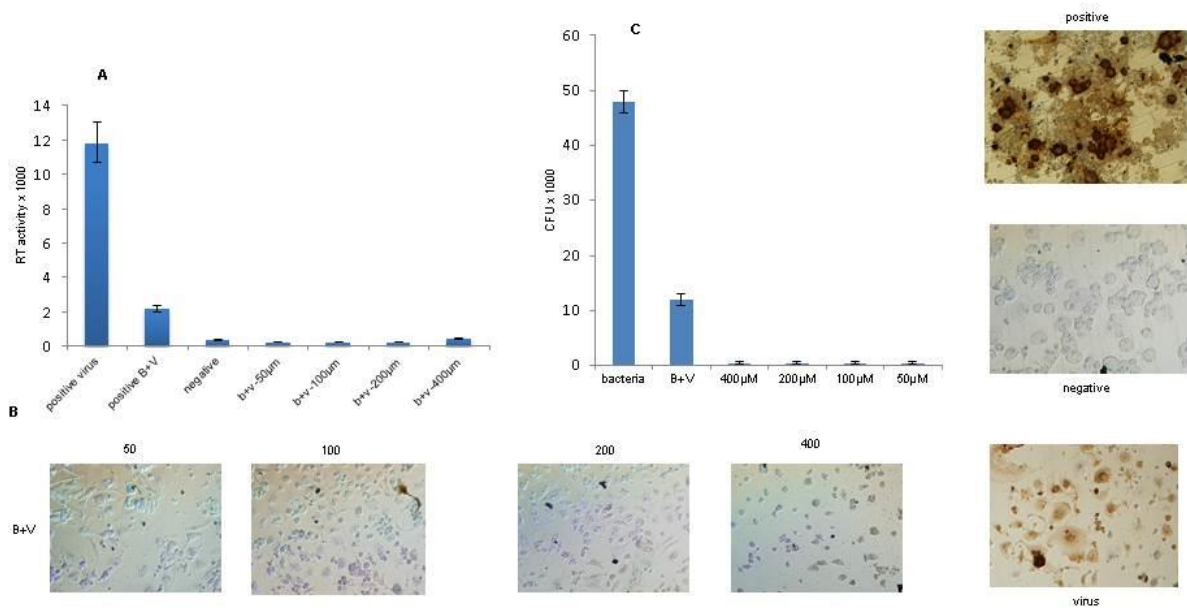

Supplementary Figure 3: **HIV infection followed by bacterial infection and use of isoniazid, rifampin, tenofavir, nevirapine combination.** A). RT assay of HIV from co-infection showing no HIV growth, Data are analysed using the t-test. Data are shown as mean +/- s.e.m. for n = 9,  $P < 0.05$ . B). P24 staining of co-infected macrophage showing little immature HIV growth, C). CFU counting of mycobacteria from co-infection showing no bacterial growth. Data are analysed using the t-test. Data are shown as mean +/- s.e.m. for n = 3,  $P < 0.05$ .

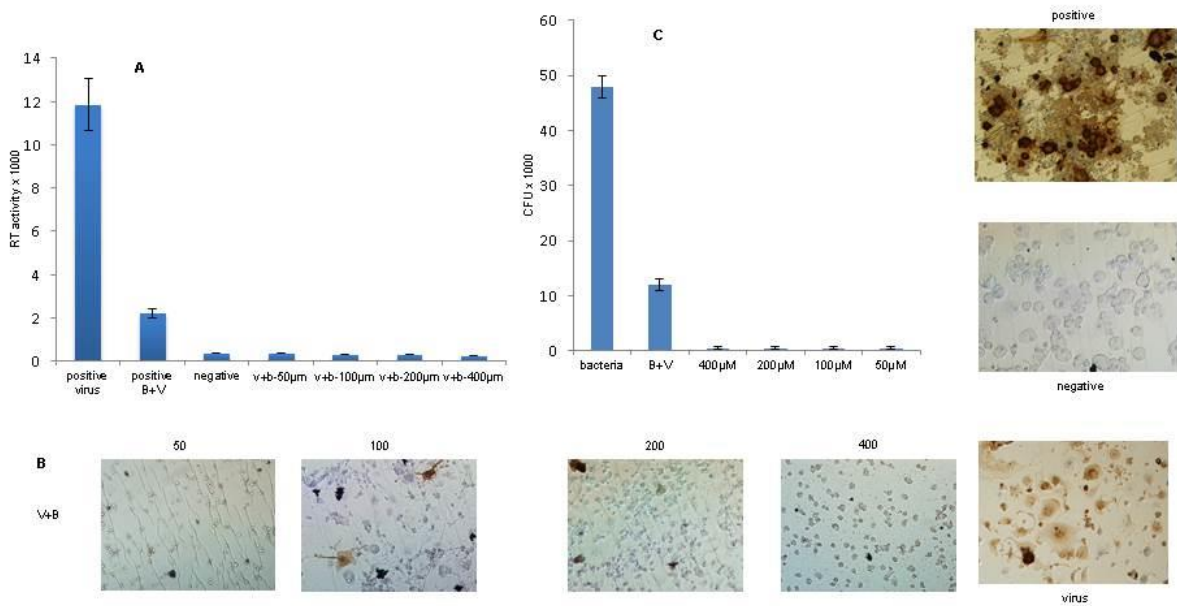

Supplementary Figure 4: **Combined HIV-smegmatis infection and use of anti-TB drug.** A).

RT assay of HIV from co-infection showing normal HIV growth. Data are analysed using the t-test. Data are shown as mean +/- s.e.m. for n = 9,  $P < 0.05$ . B). P24 staining of co-infected macrophage showing normal HIV growth,

C). CFU counting of mycobacteria from co-infection showing no bacterial growth. Data are analysed using the t-test. Data are shown as mean +/- s.e.m. for n = 3,  $P < 0.05$ .

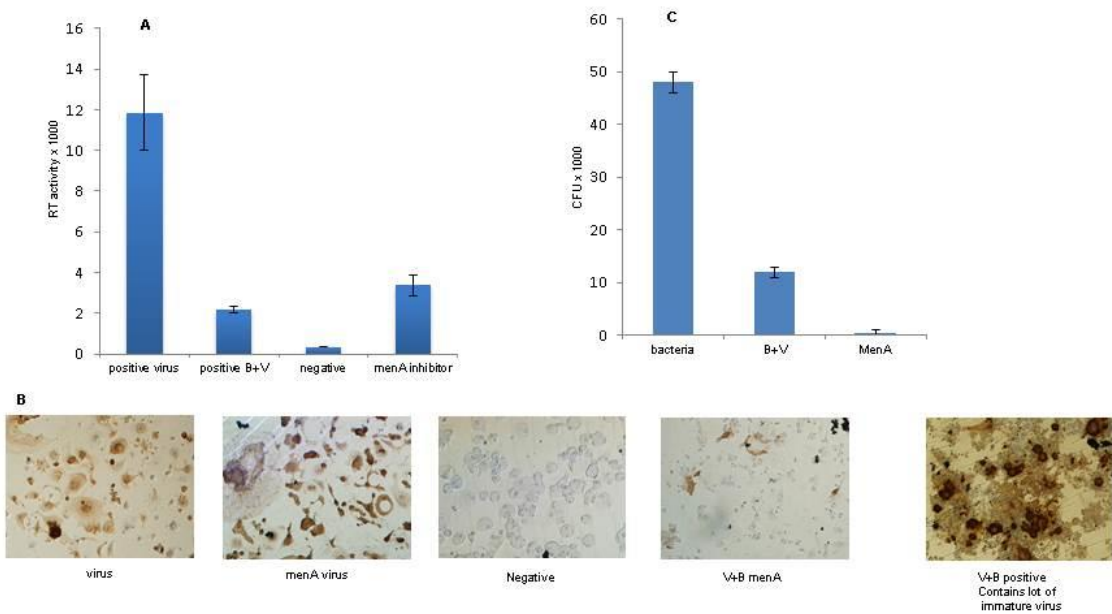

Supplementary Figure 5: **Combined HIV-smegmatis infection and use of antiviral drug**

**(tenofavir).** A). RT assay of HIV from co-infection showing no HIV growth. Data are analysed using the t-test. Data are shown as mean +/- s.e.m. for n = 9,  $P < 0.05$ . B). P24 staining of co-infected macrophage showing no HIV growth, C). CFU counting of mycobacteria from co-infection showing normal bacterial growth. Data are analysed using the t-test. Data are shown as mean +/- s.e.m. for n = 3,  $P < 0.05$

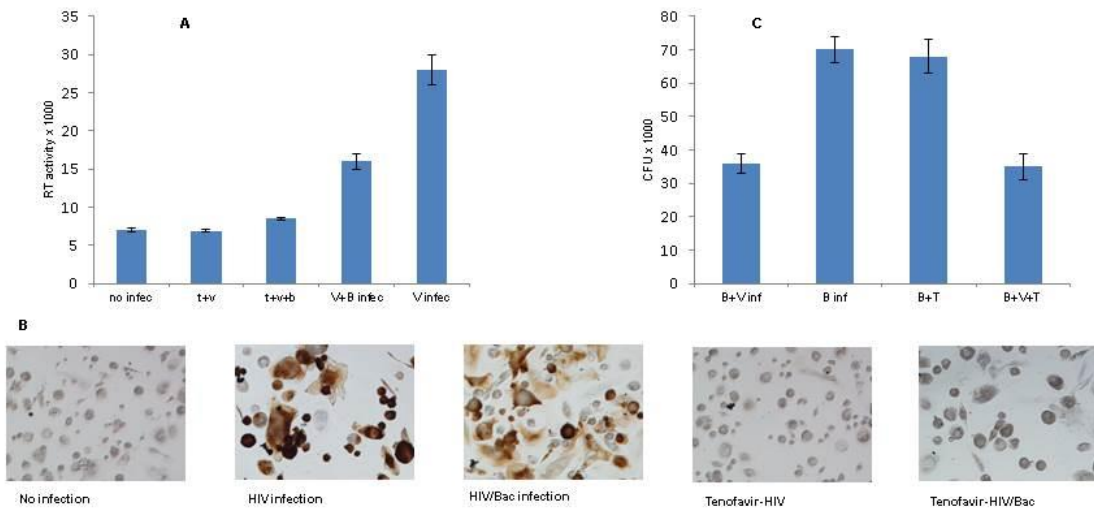

Supplementary Figure 6: **Combined HIV-smegmatis infection and use Ga-NP.** A). RT assay of HIV from co-infection showing no HIV growth. Data are analysed using the t-test. Data are shown as mean  $\pm$  s.e.m. for  $n = 9$ ,  $P < 0.05$ . B). P24 staining of co-infected macrophage showing no HIV growth, C). CFU counting of mycobacteria from co-infection showing no bacterial growth. Data are analysed using the t-test. Data are shown as mean  $\pm$  s.e.m. for  $n = 3$ ,  $P < 0.05$ .

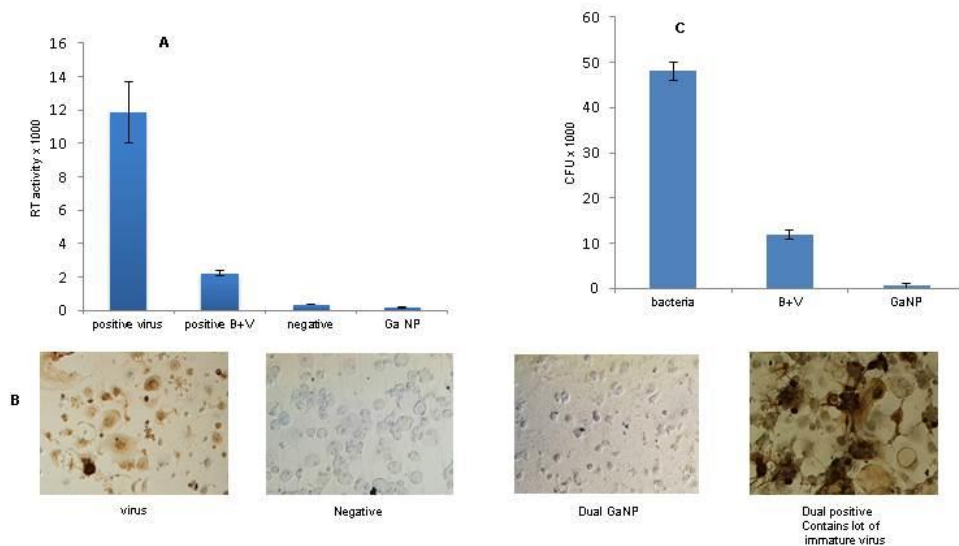

Supplement: srep08824-s1.pdf [file srep08824-s1.pdf]
